# Supplementary material for: The Evolutionary Landscape of Treatment for BRAFV600E Mutant Metastatic Colorectal Cancer
Source: MDPI journal article supplement (doi:10.3390/cancers13010137), 2021-01-04
Supplement: s1 [file s1]

# The Evolutionary Landscape of Treatment for *BRAF*<sup>V600E</sup> Mutant Metastatic Colorectal Cancer

Gianluca Mauri, Erica Bonazzina, Alessio Amatu, Federica Tosi, Katia Bencardino, Viviana Gori, Daniela Massihnia, Tiziana Cipani, Francesco Spina, Silvia Ghezzi, Salvatore Siena, and Andrea Sartore-Bianchi

**Table S1.** Main completed clinical trials which demonstrated to improve clinical outcome in *BRAF*<sup>V600E</sup> mutant metastatic colorectal cancer (mCRC) if compared to standard doublet plus anti-VEGF or anti-EGFR agents and supporting the current recommendation by NCCN and ESMO clinical guidelines.

| Therapeutic strategy        | Regimen                                      | Phase | Line of treatment                  | Patients * (N) | ORR (%) | mPFS (months) | Reference |
|-----------------------------|----------------------------------------------|-------|------------------------------------|----------------|---------|---------------|-----------|
| Immunotherapy<br>(MSI only) | Pembrolizumab<br>( <i>KEYNOTE-177</i> )      | III   | 1 <sup>st</sup>                    | 34             | 43.8**  | 16.5**        | 35        |
| Targeting MAPK pathway      | Encorafenib + cetuximab<br>( <i>BEACON</i> ) | III   | 2 <sup>nd</sup> or 3 <sup>rd</sup> | 220            | 20      | 4.2           | 25        |
| Intensive cytotoxic regimen | FOLFOXIRI + bevacizumab<br>( <i>TRIBE</i> )  | III   | 1 <sup>st</sup>                    | 16             | 56      | 7.6           | 28        |

**Keys:** \*=number of patients enrolled in the trial and treated with the regimen described in each line. \*\*=data regarding the entire cohort of metastatic colorectal cancer patients treated with pembrolizumab (N=153) and not limited to those affected by *BRAF*<sup>V600E</sup> mutant mCRC. **Legend:** ORR=overall response rate; N=number of patients included in the trial affected by *BRAF*<sup>V600E</sup> mutant colorectal cancer; mPFS=median progression-free survival.
